# Supplementary material
Source: PubMed Central journal article supplement (PMC6543477)
Supplement: AnnalsATS.201811-795OC_synn_data_supplement.pdf [file AnnalsATS.201811-795OC_synn_data_supplement.pdf]

## **Online Supplement**

Title: Cigarette Smoke Exposure and Radiographic Pulmonary Vascular Morphology in the Framingham Heart Study

Authors: Andrew J. Synn, MD, Chunyi Zhang, MPH, George R. Washko, MD MMSc, Raúl San José Estépar, PhD, George T. O'Connor, MD MS, Wenyuan Li, ScD, Murray A. Mittleman, MDCM DrPH, Mary B. Rice, MD MPH

## Figure Legends

### **Figure E1:** Difference in BV5/TBV by Pack-Years

\*Penalized spline demonstrating difference in BV5/TBV as a function of total pack-years of cigarette smoke exposure. Data were fitted using a penalized spline with 2 degrees of freedom and adjusted for age, sex, height, weight, personal educational attainment, occupation category, quartiles of census tract median neighborhood income, and Framingham Heart Study cohort (Offspring vs. Third Generation). The solid line represents adjusted difference in BV5/TBV and the dashed lines indicate the 95% confidence interval bands. The distribution of pack-years is displayed by the rug plot along the x-axis.

## Figure Legends

### **Figure E2:** Difference in BV5 and TBV by Pack-Years

\*Penalized spline demonstrating difference in TBV (A) and BV5 (B) as a function of total pack-years of cigarette smoke exposure. Data were fitted using a penalized spline with 6 degrees of freedom and adjusted for age, sex, height, weight, personal educational attainment, occupation category, quartiles of census tract median neighborhood income, and Framingham Heart Study cohort (Offspring vs. Third Generation). The solid line represents adjusted difference in BV5/TBV and the dashed lines indicate the 95% confidence interval bands. The distribution of pack-years is displayed by the rug plot along the x-axis.

Tables

**Table E1:** Associations of participant characteristics with radiographic pulmonary vascular measures

|                                          | Total Blood Vessel Volume (TBV) |         | Small Vessel Blood Volume (BV5) |         | Small Vessel Fraction (BV5/TBV) |         |
|------------------------------------------|---------------------------------|---------|---------------------------------|---------|---------------------------------|---------|
|                                          | Difference, mL (95% CI)         | p-value | Difference, mL (95% CI)         | p-value | Difference, pp (95% CI)         | p-value |
| Age (per 10 years)                       | -1.6 (-2.8, -0.3)               | 0.01    | -1.2 (-1.7, -0.6)               | <0.0001 | -0.36 (-0.54, -0.18)            | <0.0001 |
| Sex (Female vs. Male)                    | -14.6 (-17.1, -12.2)            | <0.0001 | -1.5 (-2.6, -0.5)               | 0.006   | 3.0 (2.6, 3.3)                  | <0.0001 |
| Height (per inch)                        | 4.7 (4.4, 5.1)                  | <0.0001 | 1.9 (1.8, 2.1)                  | <0.0001 | 0.08 (0.03, 0.13)               | 0.002   |
| Weight (per 10 lbs)                      | -0.6 (-0.8, -0.3)               | <0.0001 | -1.0 (-1.1, -0.8)               | <0.0001 | -0.53 (-0.57, -0.50)            | <0.0001 |
| Occupation                               |                                 |         |                                 |         |                                 |         |
| Labor vs. Professional                   | 4.9 (1.6, 8.3)                  | 0.004   | 1.6 (0.9, 3.1)                  | 0.04    | -0.1 (-0.6, 0.3)                | 0.6     |
| Sales vs. Professional                   | 0.3 (-1.8, 2.4)                 | 0.97    | -0.4 (-1.3, 0.5)                | 0.4     | -0.3 (-0.6, -0.04)              | 0.03    |
| Other vs. Professional                   | 1.1 (-1.2, 3.5)                 | 0.3     | -0.01 (-1.0, 1.0)               | 0.98    | -0.3 (-0.7, -0.01)              | 0.04    |
| Educational attainment                   |                                 |         |                                 |         |                                 |         |
| <High School vs. College Graduate        | -4.7 (-12.4, 3.1)               | 0.2     | -3.5 (-7.0, -0.1)               | 0.04    | -1.3 (-2.4, -0.1)               | 0.03    |
| High School vs. College Graduate         | -1.0 (-3.3, 1.4)                | 0.4     | -0.9 (-2.0, 0.2)                | 0.09    | -0.3 (-0.7, 0.02)               | 0.07    |
| Some College vs. College Graduate        | -2.0 (-4.0, -0.03)              | 0.046   | -1.3 (-2.1, -0.4)               | 0.005   | -0.4 (-0.6, -0.07)              | 0.01    |
| Median neighborhood income (by quartile) |                                 |         |                                 |         |                                 |         |
| 4 (highest) vs. 1 (lowest)               | 1.4 (-0.9, 3.7)                 | 0.2     | 0.09 (-0.9, 1.1)                | 0.9     | -0.3 (-0.7, -0.002)             | 0.05    |
| 3 vs. 1                                  | 1.9 (-0.5, 4.3)                 | 0.1     | -0.3 (-1.3, 0.8)                | 0.6     | -0.7 (-1.0, -0.3)               | 0.0002  |
| 2 vs. 1                                  | 3.0 (0.7, 5.4)                  | 0.01    | 0.5 (-0.6, 1.5)                 | 0.4     | -0.5 (-0.8, -0.1)               | 0.006   |
| Cohort (Third Generation vs. Offspring)  | -1.0 (-3.6, 1.6)                | 0.5     | -0.6 (-1.7, 0.6)                | 0.3     | -0.1 (-0.5, 0.2)                | 0.5     |

\*Results of fully adjusted linear regression models, including adjustment for all listed covariates and also smoking status and pack-years of cigarette smoke exposure

Tables

**Table E2:** Comparison of Spirometry and Radiographic Pulmonary Blood Vessel Volumes in Participants with Moderate-to-Severe Obstruction and Remainder of Cohort

| <b>Spirometry</b>            | <b>Participants with Moderate-to-Severe Obstruction (n=167)</b> | <b>Remainder of Cohort (n=2,109)</b> | <b>p-value</b> |
|------------------------------|-----------------------------------------------------------------|--------------------------------------|----------------|
| %-Predicted FEV <sub>1</sub> | 67.8 ± 10.1                                                     | 100.3 ± 12.7                         | <0.0001        |
| %-Predicted FVC              | 87.2 ± 11.1                                                     | 103.0 ± 12.8                         | <0.0001        |
| FEV <sub>1</sub> /FVC (%)    | 59.4 ± 7.7                                                      | 75.4 ± 5.8                           | <0.0001        |
| <b>Blood Vessel Volumes</b>  |                                                                 |                                      |                |
| BV5 (mL)                     | 53.7 ± 11.3                                                     | 56.1 ± 11.4                          | 0.01           |
| TBV (mL)                     | 141.1 ± 31.4                                                    | 143.2 ± 30.5                         | 0.39           |
| BV5/TBV (%)                  | 38.4 ± 4.3                                                      | 39.4 ± 4.1                           | 0.003          |

Tables

**Table E3:** Distribution of Cardiac Comorbidities in the Study Sample and by Smoking Status

| <b>Comorbidity (n, %)</b>       | <b>Overall Cohort<br/>(n=2,410)</b> | <b>Never-Smokers<br/>(n=1,168)</b> | <b>Former Smokers<br/>(n=1,064)</b> | <b>Current Smokers<br/>(n=178)</b> |
|---------------------------------|-------------------------------------|------------------------------------|-------------------------------------|------------------------------------|
| Cardiovascular disease          | 165 (6.9)                           | 54 (4.6)                           | 99 (9.3)                            | 12 (6.7)                           |
| Diabetes mellitus               | 215 (8.9)                           | 90 (7.7)                           | 110 (10.3)                          | 15 (8.4)                           |
| Antihypertensive medication use | 862 (35.8)                          | 360 (30.8)                         | 447 (42.0)                          | 55 (30.9)                          |
| Statin use                      | 963 (41.1)                          | 413 (36.2)                         | 489 (47.4)                          | 61 (35.5)                          |

\*Cardiovascular disease is defined as any cardiovascular event (myocardial infarction, angina pectoris, congestive heart failure, cerebrovascular accident, or death due to cardiovascular disease or stroke) as adjudicated annually by a three-person Framingham Heart Study review committee; diabetes mellitus is defined as a fasting glucose > 126 mg/dL, any diabetic medication use, or any reported history of diabetes (excluding gestational diabetes); antihypertensive medication use is defined as any self-reported use of beta blockers, calcium channel blockers, diuretics, or renin-angiotensin-aldosterone system inhibitors; statin use is defined as any self-reported use of a statin.

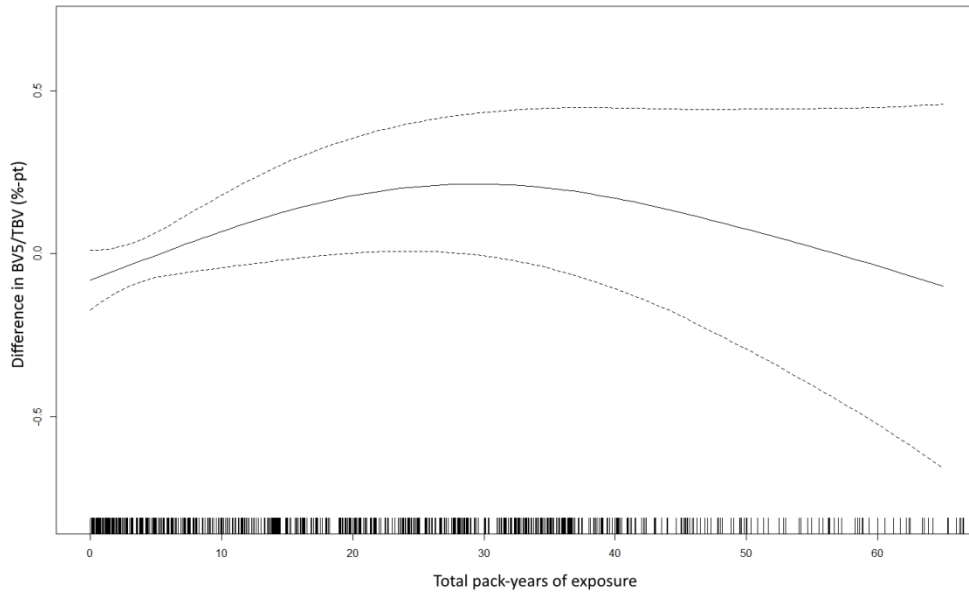

Difference in BV5/TBV by Pack-Years

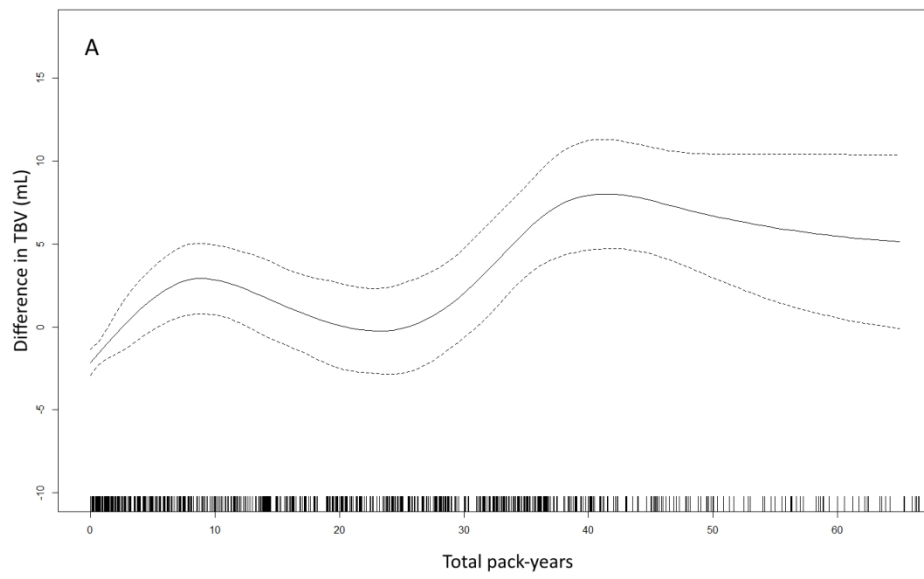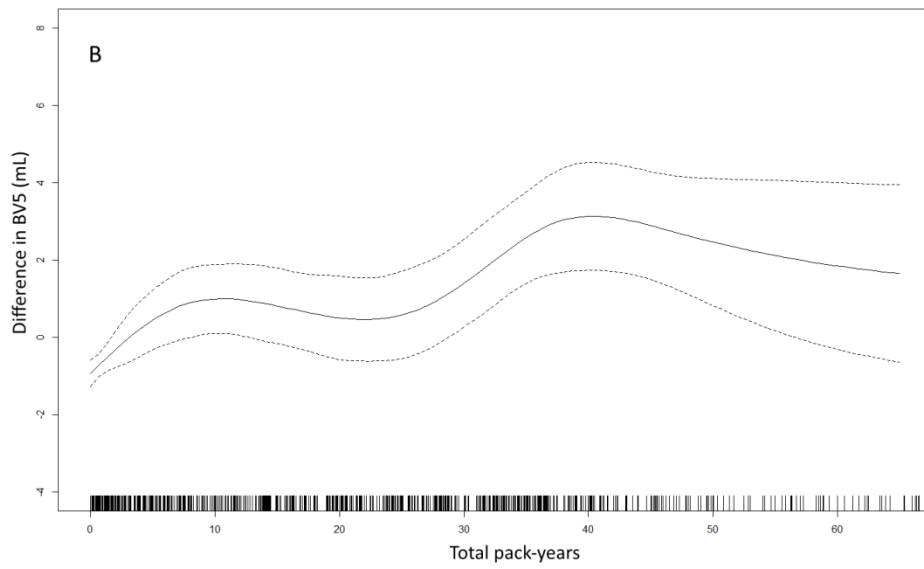

Difference in BV5 and TBV by Pack-Years
